# Supplementary material for: Optimising Crystallisation during Rapid Prototyping of Fe3O4-PA6 Polymer Nanocomposite Component
Source: MDPI journal article supplement (doi:10.3390/jcs6030083), 2022-03-07
Supplement: s1 [file s1]

Archive with 1 entries (1 files):
- jcs-1594529-supplementary.pdf
